# Supplementary material for: A Bioinformatic Pipeline Places STAT5A as a miR-650 Target in Poorly Differentiated Aggressive Breast Cancer
Source: MDPI journal article supplement (doi:10.3390/ijms21207720), 2020-10-19
Supplement: s1 [file s1]

# A bioinformatic pipeline places STAT5A as a miR-650 target in poorly differentiated aggressive breast cancer

Eric López-Huerta,<sup>1,2</sup> and Ezequiel M. Fuentes-Pananá<sup>2,\*</sup>

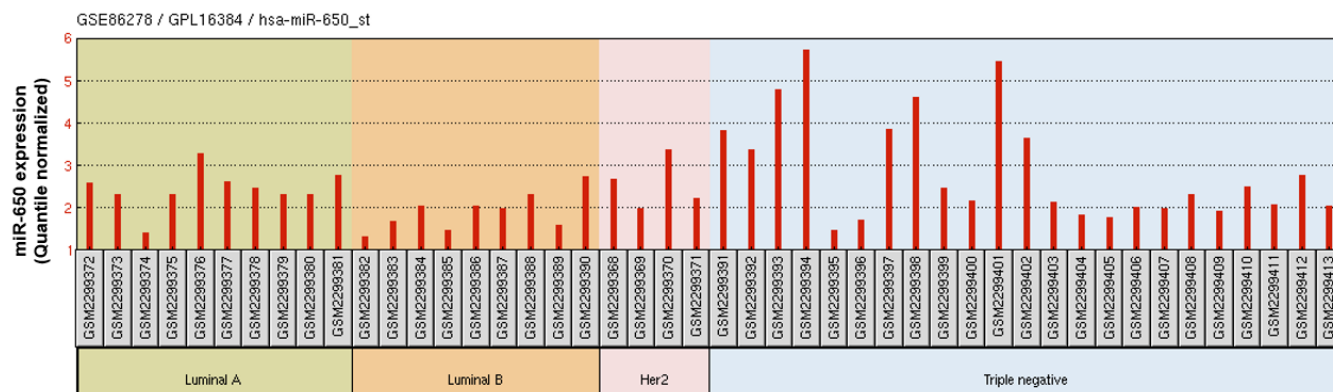

**Figure S1:** Expression levels of miR-650 among 46 Mexican patient samples from the GSE86278 dataset. Plot generated with “Profile graph” option of GEO2R available in GEO.

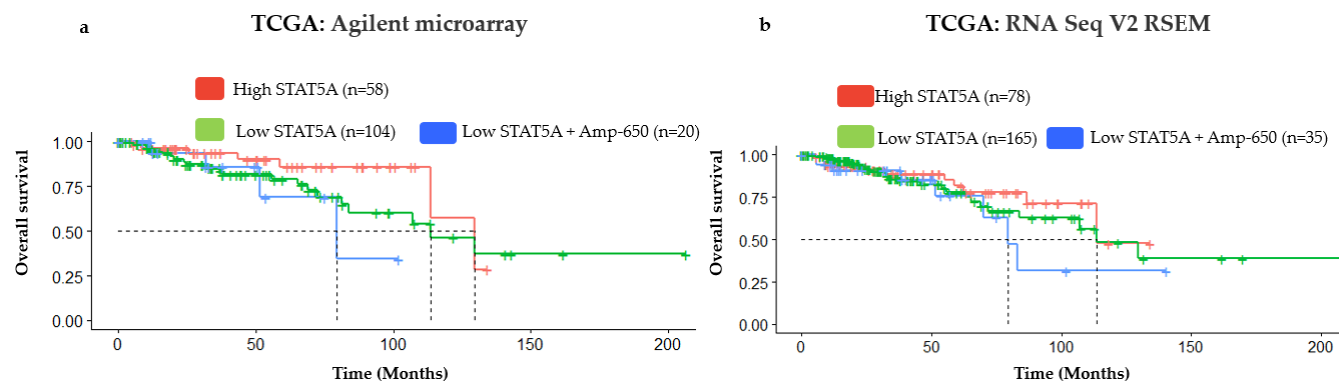

**Figure S2:** Prognostic significance of Amp-650 in combination with the expression level of STAT5A from TCGA data. Curves were constructed using: (a) Agilent microarray and (b) RNA Seq V2 RSEM, both from TCGA. Z-score was used to set the level of STAT5A expression as in figure 4. Group of High STAT5A + Amp-650 was not considered because of the small number of samples (n=9 for Agilent microarray and n=8 for RNA Seq V2 RSEM data). Dashed lines indicate median OS. No statistical differences were found between any group.

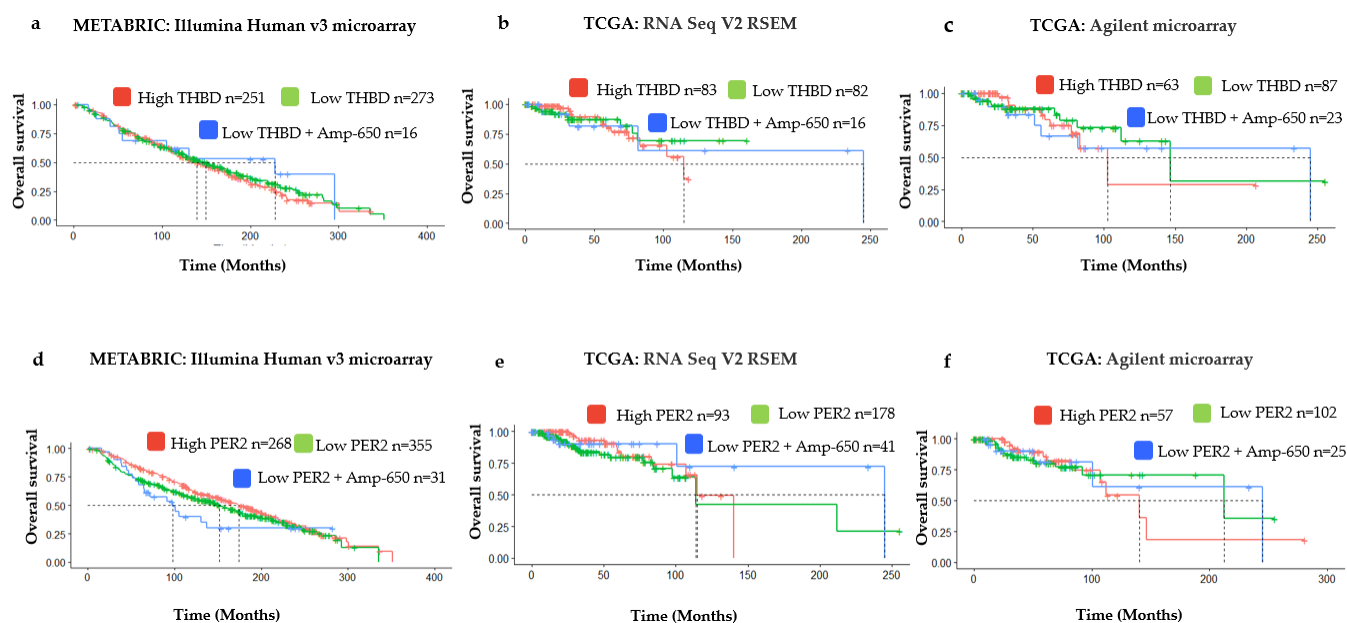

**Figure S3:** Prognostic significance of Amp-650 in combination with the expression level of THBD (a-c) and PER2 (d-f). Above each curve is indicated the expression data used in its construction. Z-score was used to set high expressing samples (above +1) or low expressing samples (below -1) of THBD/PER2. High gene expression and Amp-650 comparisons were not done because the small number of samples. Dashed lines indicate median OS. No statistical differences were found between any group.

**Table S1:** Summary of target genes of miR-650 in solid cancers and the number of tools that predicted them as targets.

| miR-650<br>target<br>gene | Number of<br>predicting tools | References |
|---------------------------|-------------------------------|------------|
| LATS2                     | 7                             | [30]       |
| ING4                      | 7                             | [13], [15] |
| NDRG2                     | 6                             | [14]       |
| SCARA3                    | 6                             | [16]       |
| PPP2CA                    | 3                             | [29]       |

**Table S2:** Summary of results obtained with miRWalk2.0

| Number of<br>prediction tools | Sum of<br>target genes |
|-------------------------------|------------------------|
| 12                            | 0                      |
| 11                            | 5                      |
| 10                            | 41                     |
| 9                             | 164                    |
| 8                             | 550                    |
| 7                             | 1130                   |
| 6                             | 1360                   |
| 5                             | 1643                   |
| 4                             | 2030                   |
| 3                             | 2874                   |
| 2                             | 4309                   |
| 1                             | 3751                   |
